# Supplementary material for: RNA Biological Characteristics at the Peak of Cell Death in Different Hereditary Retinal Degeneration Mutants
Source: Front Genet. 2021 Oct 29;12:728791. doi: 10.3389/fgene.2021.728791 (PMC8586524; doi:10.3389/fgene.2021.728791)
Supplement: Supplementary file 2 [file Table3.XLSX]

## Sheet: Sheet1
AA	11p15.3		2021-02-04	5q14.3		PROS1	3q11.1
ABCA4	1p22.1		FEVR	11q14.2		PRP3	1q21.2
ABCC6	16p13.11		FHASD	16q23.2-q24.2		PRP16	16q22.2
ABCR	1p22.1		FIGLER4	4q25		PRP31	19q13.42
ABHD12	20p11.21		FLJ23560	12q21.2		PRPC8	17p13.3
ABL	4q23		FLJ35630	4q27		PRPF3	1q21.2
ABRI	13q14.2		FLVCR1	1q32.3		PRPF4	9q32
ACBD5	10p12.1		FRITZ	2p15		PRPF6	20q13.33
ACDP4	2q11.2		FSCN2	17q25.3		PRPF8	17p13.3
ACHM1	not 14		FZD4	11q14.2		PRPF31	19q13.42
ACHM2	2q11.2		GAR1	16q21		PRPH2	6p21.1
ACHM3	8q21.3		GARP	16q21		PRPS1	Xq22.3
ACHM4	1p13.3		GCAP1	6p21.1		PRSS11	10q26.13
ACHM5	10q23.33		GCAP2	6p21.1		PTBHS	18p11.31-p11.23
ACO2	22q13.2		GCP	Xq28		PTHB1	7p14.3
ACONM	22q13.2		GDF6	8q22.1		PTS2R	6q23.3
ADAM9	8p11.23		GNAT1	3p21.31		PWDMP	4p14
ADAMTS18	16q23.1		GNAT2	1p13.3		PXE	16p13.11
ADCA2	3p14.1		GNB3	12p13.31		PXMP3	8q21.13
ADGRV1	5q14.3		GNPTG	16p13.3		QRX	19p13.3
ADIPOR1	1q32.1		GOP	Xq28		R9AP	19q13.12
ADNIV	11q13.5		GPR98	5q14.3		RAB28	4p15.33
AFG3L2	18p11.21		GPR125	4p15.2		RAX2	19p13.3
AGBL5	2p23.3		GPR179	17q12		RAXL1	19p13.3
AGS	20p12.2		GRK1	13q34		RB1	13q14.2
AGS1	3p21.31		GRM6	5q35.3		RBP3	10q11.22
AHI1	6q23.3		GUCA1A	6p21.1		RBP4	10q23.33
AHR	7p21.1		GUCA1B	6p21.1		RCBT1	13q14.2
AIED	same as CACNA1F		GUCY2D	17p13.1		RCBTB1	13q14.2
AIPL1	17p13.2		HARP	20p13		RCD1	6q25-q26
ALMS1	2p13.1		HARS	5q31.3		RCD2	same as GUCY2D
ALS2CR4	2q33.1		HBM	11q13.2		RCD4	12p13.33
ALSS	2p13.1		HECIC2	2q11.2		RCD3A	12p12.3
AOM	12q13.11		HF1	1q31.3		RCD3B	9p24.2
ARA	16p13.11		HGSNAT	8p11.21-p11.1		RCDP1	6q23.3
ARHGEF18	19p13.2		HK1	10q22.1		RCP	Xq28
ARL3	10q24.32		HK5P	10q23.33		RD3	1q32.3
ARL6	3q11.2		HMCN1	1q25.3-q31.1		RDH1	12q13.2
ARL2BP	16q13.3		HMSN6B	5q22.1		RDH5	12q13.2
ARMD1	1q25.3-q31.1		HMX1	4p16.1		RDH11	14q24.1
ARMD2	1p22.1		HPRP3	1q21.2		RDH12	14q24.1
ARMD3	14q32.12		HRG4	17q11.2		RDPA	10p13
ARMD4	1q31.3		HRS	5q31.3		RDS	6p21.1
ARMD5	10q11.23		HSD3	14q31.3		REEP6	19p13.3
ARMD6	19p13.3		HT2A	9q33.1		RETGC	17p13.1
ARMD7	10q26.13		HTRA1	10q26.13		RETGC1	17p13.1
ARMD8	10q26.13		HTRA3	11q13.5		RGR	10q23.1
ARMD9	19p13.3		ICRD	22q13.2		RGS9	19q13.12
ARMD10	9q33.1		IDH3B	20p13		RGS9	17q24.1
ARMS1	1q31.3		IFT27	22q12.3		RGS9BP	19q13.12
ARMS2	10q26.13		IFT38	16p13.3		RHO	3q22.1
ARSG	17q24.2		IFT81	12q24.11		RHOK	13q34
ARTS	Xq22.3		IFT140	16p13.3		RIM1	6q13
ASCC3L1	2q11.2		IFT144	4p14		RIMS1	6q13
ASP	19p13.3		IFT172	2p33.3		RK	13q34
ASRGL1	11q12.3		ILFS2	2p24.3		RLBP1	15q26.1
ATD5	4p14		IMPDH1	7q32.1		RMCH	not 14
ATF6	1q23.3		IMPG1	6q14.1		RMCH1	8q21.3
ATF6A	1q23.3		IMPG2	3q12.3		RMCH2	2q11.2
ATP6	mitochondrion		INPP5E	9q34.3		RNANC	10q21
ATXN7	3p14.1		INVS	9q31.1		ROA1	8q21-q22
AXPC1	1q32.3		IQCB1	3q13.33		RODX	15q22.31
BART	16q13.3		IRBP	10q11.22		ROM1	11q12.3
BART1	16q13.3		IRD	7q21.2		ROP	Xq28
BBIP1	10q25.2		ISQMR	6q14.1		RP1	8q12.1
BBIP10	10q25.2		ITM2B	13q14.2		RP2	Xp11.23
BBS1	11q13		JAG1	20p12.2		RP3	Xp11.4
BBS2	16q13		JBTS1	9q34.3		RP4	3q22.1
BBS3	3q11.2		JBTS2	11q12.2		RP5	same as RHO
BBS4	15q24.1		JBTS3	6q23.3		RP6	Xp21.3-p21.2
BBS5	2q31.1		JBTS4	2q13		RP7	6p21.1
BBS6	20p12.2		JBTS5	12q21.32		RP8	not 9q34-qter
BBS7	4q27		JBTS7	16q12.2		RP9	7p14.3
BBS8	14q32.11		JBTS9	4p15.33		RP10	7q32.1
BBS9	7p14.3		JBTS14	2q33.1		RP11	19q13.42
BBS10	12q21.2		JBTS19	16q12.1		RP12	1q31.3
BBS11	9q33.1		JNCL	16p11.2		RP13	17p13.3
BBS12	4q27		KCNJ13	2q37.1		RP14	6p21.31
BBS13	17q22		KCNV2	9p24.2		RP15	same as RPGR
BBS14	12q21.32		KFS1	8q22.1		RP16	not 14
BBS15	2p15		KIAA1005	16q12.2		RP17	17q23.2
BBS16	1q43		KIAA1549	7q34		RP18	1q21.2
BBS17	3p21.31		KIF11	10q23.33		RP19	1p22.1
BBS18	10q25.2		KIF3B	20q11.21		RP20	1p31.2
BBS19	22q12.3		KIP2	15q25.1		RP21	not 9q34-qter
BBS21	8q22.1		KIZ	20p11.23		RP22	16p12.3-p12.1
BBS2L1	4q27		KLHL7	7p15.3		RP23	Xp22.2
BCAMD	6p12.3-q16		KNO2	16q23.1		RP24	Xq26-q27
BCD	4q35.2		KNSL1	10q23.33		RP25	6q12
BCM	Xq28		KSS	mitochondrion		RP26	2q31.3
BCP	7q32.1		LAMA1	18p11.31-p11.23		RP27	14q11.2
BEST1	11q12.3		LCA1	17p13.1		RP28	2p15
BF	6p21.32		LCA2	1p31.2		RP29	4q32-q34
BFD	6p21.32		LCA3	14q31.3		RP30	17q25.3
BNHS	19p13.2		LCA4	17p13.2		RP31	9p21.1
BRR2	2q11.2		LCA5	6q14.1		RP32	1p13.3
C1orf36	1q32.3		LCA6	14q11.2		RP33	2q11.2
C2orf71	2p23.2		LCA7	19q13.32		RP34	Xq28-qter
C3orf34	3q29		LCA8	1q31.3		RP35	1q22
C5orf37	5q13.3		LCA9	1p36.22		RP36	17q25.1
C8orf37	8q22.1		LCA10	12q21.32		RP37	15q23
C9orf81	9q21.2		LCA11	7q32.1		RP38	2q13
C12orf65	12q24.31		LCA12	1q32.3		RP39	1q41
C21orf2	21q22.3		LCA13	14q24.1		RP40	4p16.3
C2	6p21.32		LCA14	4q32.1		RP41	4p15.32
C3	19p13.3		LCA15	6p21.31		RP42	7p15.3
C1QTNF5	11q23.3		LCA16	2q37.1		RP43	5q33.1
CA4	17q23.2		LCA17	8q22.1		RP44	10q23.1
CABP4	11q13.1		LCA18	6p21.1		RP45	16q21
CACD	17p13		LHON	mitochondrion		RP46	20p13
CACD1	17p13		LOC387715	10q26.13		RP47	2q37.1
CACD2	6p21.1		LOC619531	2q11.2		RP48	6p21.1
CACNA1F	Xp11.23		LRAT	4q32.1		RP49	4p12
CACNA2D4	12p13.33		LRIT3	4q25		RP50	11q12.3
CAPN5	11q13.5		LRP5	11q13.2		RP51	14q32.11
CBBM	Xq28		LUN	9p21.1		RP53	14q24.1
CBD	Xq28		LZTFL1	3p21.31		RP54	2p23.2
CBP	Xq28		MAK	6p24.2		RP55	3q11.2
CBT	7q32.1		MAPKAPK3	3p21.2		RP56	3q12.3
CC2D2A	4p15.33		MARF	1p36.22		RP57	17q25.3
CCCAP	1q43		MASS1	5q14.3		RP58	2p23.3
CCMD	4q28.2		MCCRP1	22q13.33		RP59	1p36.11
CCT2	12q15		MCCRP2	4q28.2		RP60	20q13.33
CCTB	12q15		MCCRP3	15q15.3		RP61	3q25.1
CDH3	16q22.1		MCDCA	6p12.3-q16		RP62	6p24.2
CDH23	10q22.1		MCDR1	6q16.2		RP63	6q23
CDHP	16q22.1		MCDR2	4p15.32		RP64	8q22.1
CDHR1	10q23.1		MCDR3	5p15.33-p13.1		RP65	10q23.1
CDMP2	8q22.1		MCDR4	14q11.2		RP66	10q11.22
CDV1	12q24.11		MCDR5	19q13.31-q13.32		RP67	1q32.3
CED4	4p14		MCLMR	10q23.33		RP68	3q26.2
CEP19	3q29		MCMP	8p11.23		RP69	20p11.23
CEP78	9q21.2		MCOP2	11q23.3		RP70	9q32
CEP164	11q23.3		MCOPS5	14q22.3		RP71	2p33.3
CEP250	20q11.22		MDC9	8p11.23		RP72	11p11.2
CEP290	12q21.32		MDDC	7p21-p15		RP73	8p11.21-p11.1
CERKL	2q31.3		MDDGA3	1p34.1		RP74	16q13
CFB	6p21.32		MDDGB3	1p34.1		RP75	2p23.3
CFH	1q31.3		MDDGC3	1p34.1		RP76	1p34.1
CHBL	3p21.31		MDPT1	6p21.1		RP77	19p13.3
CHM	Xq21.2		MDPT2	5q31.2		RP78	19p13.2
CIB2	15q25.1		MERTK	2q13		RP79	10q22.1
CLCC1	1p13.3		MFN2	1p36.22		RP80	16p13.3
CLN1	1p34.2		MFRP	11q23.3		RP89	20q11.21
CLN3	16p11.2		MFSD8	4q28.2		RP1L1	8p23.1
CLN7	4q28.2		MGA3	19q13.32		RPE65	1p31.2
CLRN1	3q25.1		MIEF1	22q13.1		RPGR	Xp11.4
CLUAP1	16p13.3		MIR204	9q21.12		RPGRIP1	14q11.2
CMT6	1p36.22		MKKS	20p12.2		RPGRIP1L	16q12.2
CMT2A2	1p36.22		MKS1	17q22		RPSKA	5q12.3
CMT6B	5q22.1		MKS2	11q12.2		RS1	Xp22.13
CMTX5	Xq22.3		MKS4	12q21.32		RTN4IP1	6q21
CNCG	4p12		MKS5	16q12.2		RVCL	3p21.31
CNCG1	4p12		MKS6	4p15.33		SAG	2q37.1
CNCG2	16q21		MLSN1	15q13.3		SAMD11	1p36.33
CNCG3	2q11.2		MODY6	2q31.3		SANS	17q25.1
CNCG3L	16q21		MOSPGF	3q29		SCA7	3p14.1
CNGA1	4p12		MPS3C	8p11.21-p11.1		SCA28	18p11.21
CNGA3	2q11.2		MRP6	16p13.11		SCA34	6q14.1
CNGB1	16q21		MRST	15q24		SDCCAG8	1q43
CNGB3	8q21.3		MT-ATP6	mitochondrion		SEMA4A	1q22
CNNM4	2q11.2		MT-TH	mitochondrion		SEMAB	1q22
COD1	same as RPGR		MT-TL1	mitochondrion		SFD	22q12.3
COD2	Xq27		MT-TP	mitochondrion		SIFD	3p26.2
COD3	6p21.1		MT-TS2	mitochondrion		SLC24A1	15q22.31
COD4	10q23.33		MTLV	2p16.1		SLC25A46	5q22.1
COD5	Xq28		MTP	4q23		SLC4A7	3p24.1
CODA1	12q13.13-q14.3		MTTP	4q23		SLC7A14	3q26.2
COL11A1	1p21.1		MVK	12q24.11		SLSN1	2q13
COL2A1	12q13.11		MYO7A	11q13.5		SLSN3	3q22.1
COL9A1	6q13		MZSDS	16p13.3		SLSN4	1p36.31
CORD1	18q21.1-q21.3		NAG	2p24.3		SLSN5	3q13.33
CORD2	19q13.32		NARP	mitochondrion		SLSN6	12q21.32
CORD3	1p22.1		NBAS	2p24.3		SLSN7	1q43
CORD4	17q		NCKX	15q22.31		SLSN8	4p14
CORD5	17p13.2		NCMD	6q16.2		SNRNP200	2q11.2
CORD6	17p13.1		NDP	Xp11.3		SOPH	2p24.3
CORD7	6q13		NEK2	1q32.3		SPAM	6q12
CORD8	1q23.1-q23.3		NET2	7q31.31		SPARC	6q14.1
CORD9	8p11.23		NEUROD1	2q31.3		SPARCAN	3q12.3
CORD10	1q22		NIR1	17p13.2		SPATA7	14q31.3
CORD11	19p13.3		NLK1	1q32.3		SPAX5	18p11.21
CORD12	4p15.32		NMNAT1	1p36.22		SPG39	19p13.2
CORD13	14q11.2		NNO2	11q23.3		SPG55	12q24.31
CORD14	6p21.1		NPHP1	2q13		SPP2	2q37.1
CORD15	10q23.1		NPHP2	9q31.1		SPP24	2q37.1
CORD16	8q22.1		NPHP3	3q22.1		SRTD3	11q22.3
CORD17	10q26		NPHP4	1p36.31		SRTD5	4p14
CORD18	4p15.33		NPHP5	3q13.33		SRTD9	16p13.3
CORD19	14q24.3		NPHP6	12q21.32		SRTD10	2p33.3
CORD20	12q21.33		NPHP8	16q12.2		SRTD11	9q34.11
CORDX1	Xp11.4		NPHP10	1q43		STAMP	14q24.3
CORDX2	Xq27		NPHP13	4p14		STGD1	1p22.1
CORDX3	Xp11.23		NPHP14	16q12.1		STGD2	not 13q34
CORS1	9q34.3		NPHP15	11q23.3		STGD3	6q14.1
CORS2	11q12.2		NPHP17	2p33.3		STGD4	4p15.32
COXPD7	12q24.31		NR2E3	15q23		STL1	12q13.11
CPHD6	14q22.3		NR2F1	5q15		STL2	1p21.1
CRALBP	15q26.1		NRL	14q11.2		SVD	2q37.1
CRB1	1q31.3		NYX	Xp11.4		TCF13	11p15.3
CRDHL	9q21.2		OA2	same as CACNA1F		TEAD1	11p15.3
CRV	3p21.31		OAT	10q26.13		TEF1	11p15.3
CRX	19q13.32		OFD1	Xp22.2		TEM5L	4p15.2
CSNB1	Xp11.4		OMCS	19p13.2		THPH5	3q11.1
CSNB2	Xp11.23		ONCR	10q24.31		TIMM8A	Xq22.1
CSNB3	4p16.3		OPA1	3q29		TIMP3	22q12.3
CSNB4	Xp11.4		OPA2	Xp11.4-p11.2		TLR3	4q35.1
CSNB1A	Xp11.4		OPA3	19q13.32		TLR4	9q33.1
CSNB1B	5q35.3		OPA4	18q12.2-q12.3		TMEM76	8p11.21-p11.1
CSNB1C	15q13.3		OPA5	22q12.1-q13.1		TMEM77	1p13.3
CSNB1D	15q22.31		OPA6	8q21-q22		TMEM126A	11q14.1
CSNB1E	17q12		OPA7	11q14.1		TMEM216	11q12.2
CSNB1H	12p13.31		OPA8	16q21-q22.3		TMEM237	2q33.1
CSNB2A	Xp11.23		OPA9	22q13.2		TOPORS	9p21.1
CSNB2B	11q13.1		OPA10	6q21		TREX1	3p21.31
CSNBAD1	3q22.1		OPCA3	3p14.1		TRIM32	9q33.1
CSNBAD2	4p16.3		OPN2	3q22.1		TRIP5	10q23.33
CSNBAD3	3p21.31		OPN1LW	Xq28		TRNH	mitochondrion
CSNBX2	Xp11.23		OPN1MW	Xq28		TRNL1	mitochondrion
CSPG2	5q14.3		OPN1SW	7q32.1		TRNP	mitochondrion
CSPP1	8q13.1-q13.2		OPPG	11q13.2		TRNS2	mitochondrion
CTNNA1	5q31.2		OR2W3	1q44		TRNT1	3p26.2
CTRP5	11q23.3		ORP1	8q12.1		TRPM1	15q13.3
CWC27	5q12.3		OTX2	14q22.3		TSPAN12	7q31.31
CYMD	7p21-p15		P53BP3	9p21.1		TTC8	14q32.11
CYP4V2	4q35.2		PAF1	8q21.13		TTLL5	14q24.3
DCB	Xq28		PAHX	10p13		TTPA	8q12.3
DDP	Xq22.1		PANK2	20p13		TU15B	11q12.3
DDP2	Xq22.1		PAP1	7p14.3		TUB	11p15.4
DFN1	Xq22.1		PAQR1	1q32.1		TUBGCP4	15q15.3
DFNA38	4p16.1		PAX2	10q24.31		TUBGCP6	22q13.33
DFNB2	11q13.5		PBCRA1	6q16.2		TULP1	6p21.31
DFNB12	10q22.1		PCAD	16q22.1		UNC119	17q11.2
DFNB18	11p15.1		PCARE	2p23.2		USH1	not 14q32
DFNB23	10q21.1		PCDH15	10q21.1		USH3	3q25.1
DFNB31	9q32		PCDH21	10q23.1		USH1A	not 14q32
DFNB36	1p36.31		PCYT1A	3q29		USH1B	11q13.5
DFNB48	15q25.1		PDE6A	5q33.1		USH1C	11p15.1
DFNX1	Xq22.3		PDE6B	4p16.3		USH1D	10q22.1
DHDDS	1p36.11		PDE6C	10q23.33		USH1E	21q21
DHRD	2p16.1		PDE6G	17q25.3		USH1F	10q21.1
DHX38	16q22.2		PDE6H	12p12.3		USH1G	17q25.1
DMD	Xp21.2-p21.1		PDEA2	10q23.33		USH1H	15q22-q23
DMDF	mitochondrion		PDZD7	10q24.31		USH1J	15q25.1
DRAM2	1p13.3		PDZK7	10q24.31		USH1K	10p11.21-q21.1
DTHD1	4p14		PEX1	7q21.2		USH2A	1q41
DYNC2H1	11q22.3		PEX2	8q21.13		USH2B	not 3p24.2-p23
DYNC2I2	9q34.11		PEX7	6q23.3		USH2C	5q14.3
EAR3	5q15		PGK1	Xq21.1		USH2D	9q32
EFEMP1	2p16.1		PGR21	4p15.2		USH3A	3q25.1
EG5	10q23.33		PHARC	20p11.21		USH3B	5q31.3
ELOVL1	1p34.2		PHYH	10p13		VCAN	5q14.3
ELOVL4	6q14.1		PIM1K	7p14.3		VLGR1	5q14.3
EMC1	1p36.13		PITPNM3	17p13.2		VMD1	not 8q24
ENSA	1q21.3		PKAN	20p13		VMD2	11q12.3
ERCC6	10q11.23		PLA2G5	1p36.13-p36.12		VMD3	6p21.1
ERVR	5q14.3		PLK4	4q28.2		VRD1	22q13
ESCS	15q23		PMP35	8q21.13		VRNI	11q13.5
ESPN	1p36.31		PNAT1	1p36.22		WDPCP	2p15
EVR1	11q14.2		PNPLA6	19p13.2		WDR19	4p14
EVR2	Xp11.3		PNR	15q23		WDR34	9q34.11
EVR3	11p13-p12		POC5	5q13.3		WDTC2	16p13.3
EVR4	11q13.2		POC1B	12q21.33		WFS1	4p16.1
EVR5	7q31.31		POMGNT1	1p34.1		WFS2	4q22-q24
EVR6	11p11.2		PPT	1p34.2		WGN1	5q14.3
EXOSC2	9q34.12		PPT1	1p34.2		WHRN	9q32
EYS	6q12		PRCD	17q25.1		XLRS1	Xp22.13
FAM161A	2p15		PRD	Xp11.3-p11.23		ZNF408	11p11.2
FBLN3	2p16.1		PRDM13	6q16.2		ZNF423	16q12.1
FBLN5	14q32.12		PROM1	4p15.32		ZNF513	2p23.3
FBLN6	1q25.3-q31.1		PROML1	4p15.32
